# Supplementary material for: Effects of Heat Acclimation on Photosynthesis, Antioxidant Enzyme Activities, and Gene Expression in Orchardgrass under Heat Stress
Source: PubMed Central journal article supplement (PMC6271748; doi:10.3390/molecules190913564), 2014-09-01

# Supporting Information

**Figure S1.** Dissociation curves for housekeeping gene ( $\beta$ -actin) (A) and antioxidant genes SOD (B), CAT (C), and POD (D) with single peak.

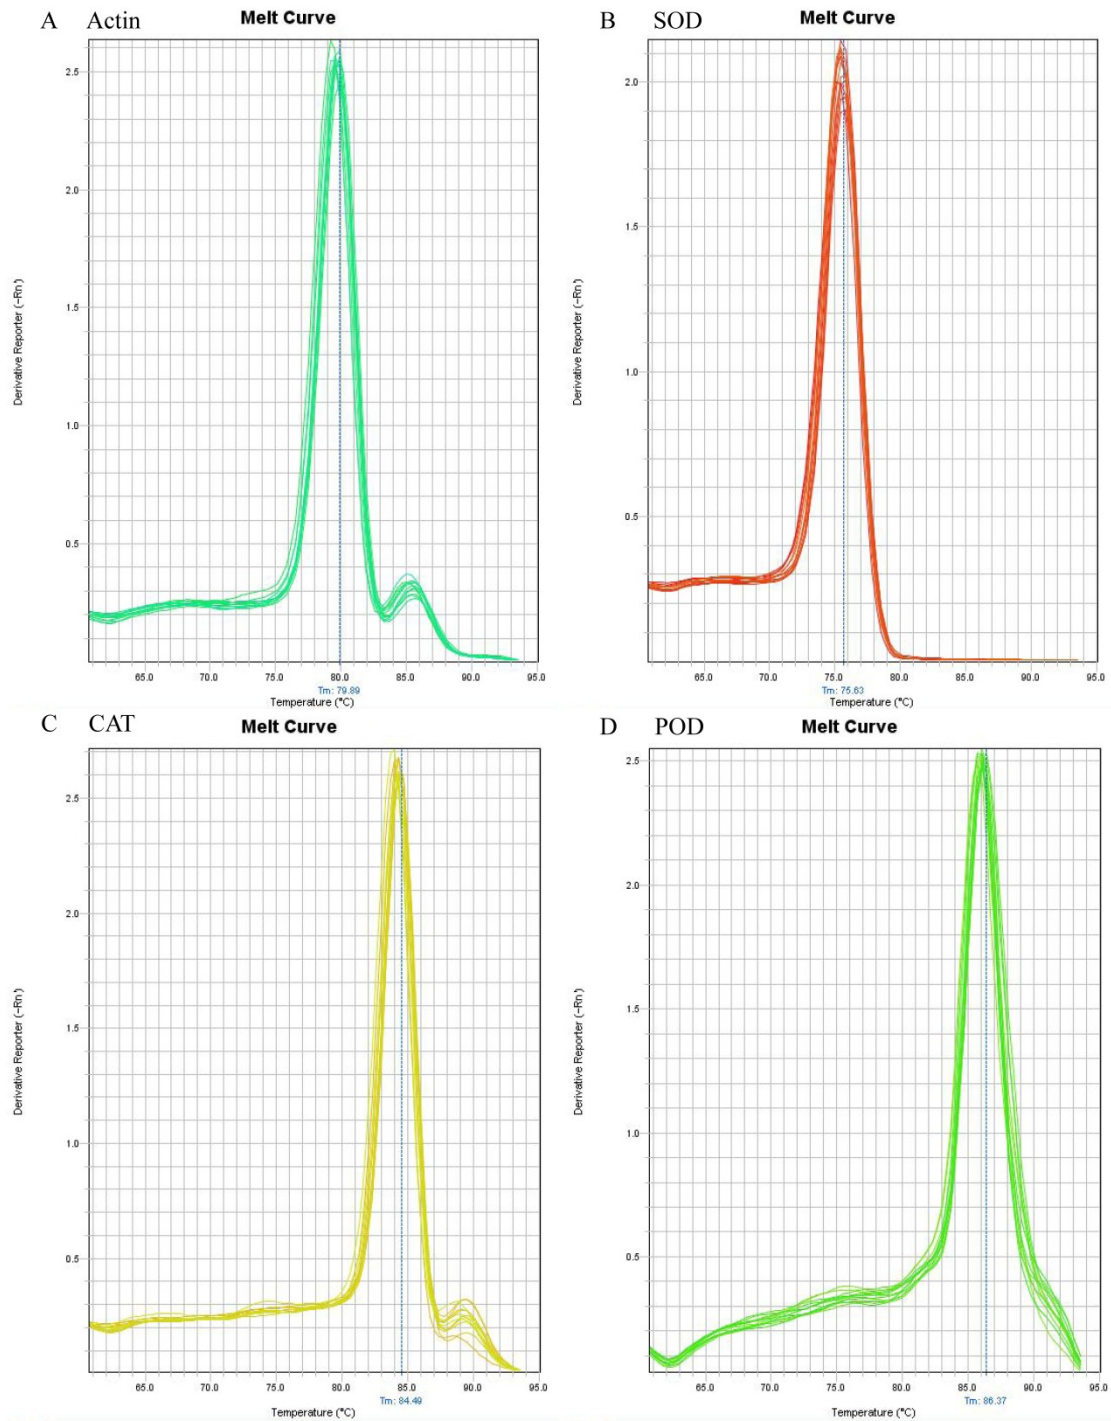

Supplement: molecules-19-13564-s001.pdf [file molecules-19-13564-s001.pdf]
